# Supplementary material for: Antioxidant Properties and Cytoprotective Effect of Pistacia lentiscus L. Seed Oil against 7β-Hydroxycholesterol-Induced Toxicity in C2C12 Myoblasts: Reduction in Oxidative Stress, Mitochondrial and Peroxisomal Dysfunctions and Attenuation of Cell Death
Source: MDPI journal article supplement (doi:10.3390/antiox10111772), 2021-11-05
Supplement: s1 [file s1]

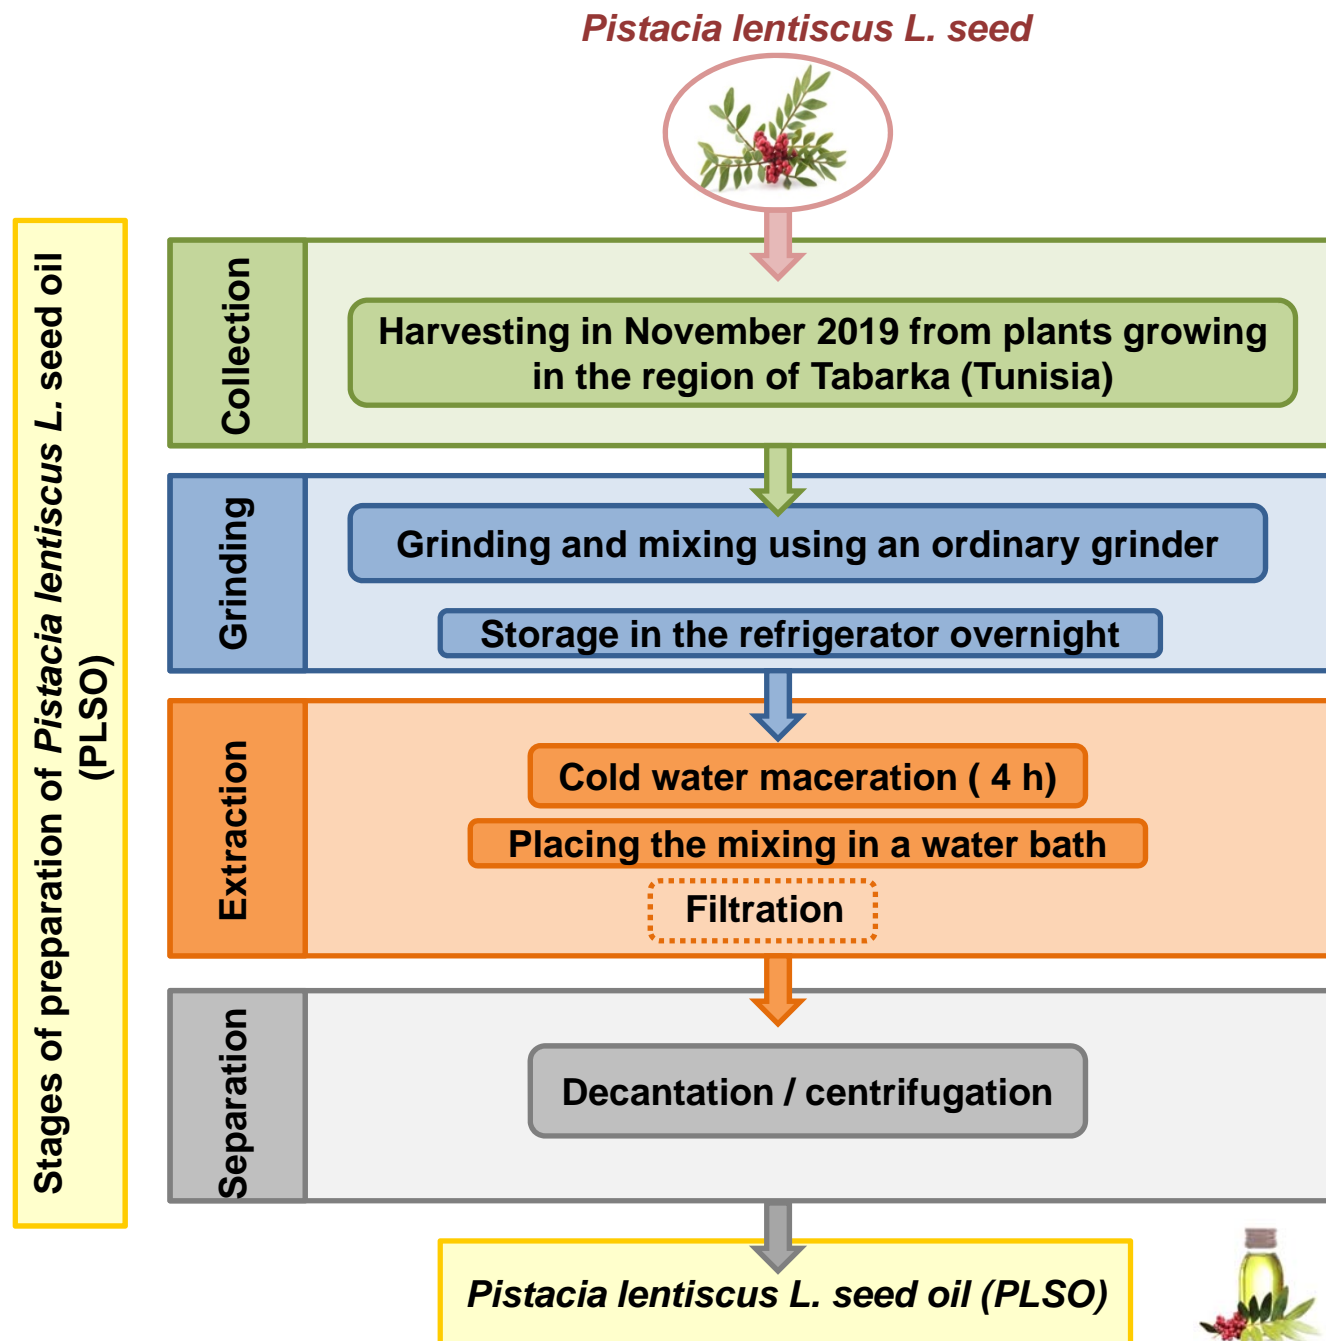

Supplementary Figure S1: Different stages of preparation of the *Pistachia lentiscus* L. seed oil (PLSO) with seeds collected in Tunisia (area of Tabarka).

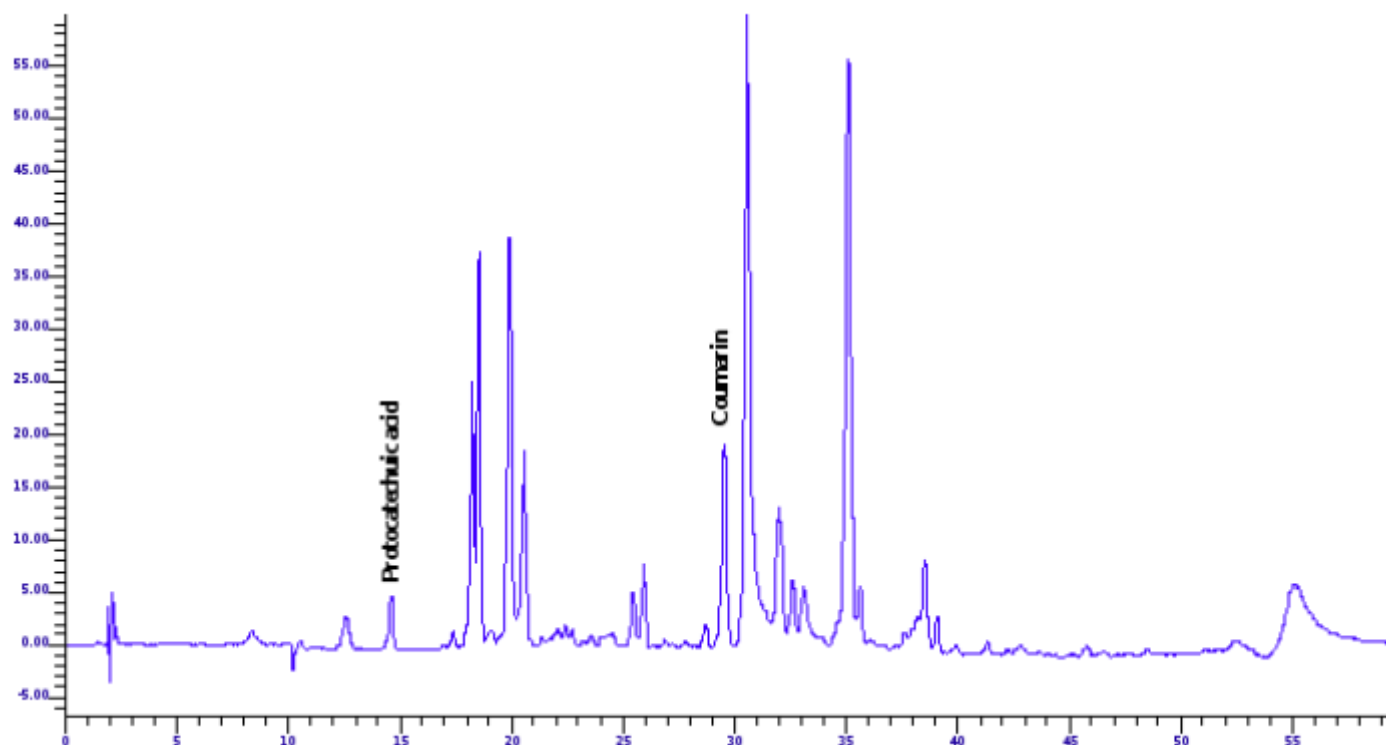

**Supplementary Figure S2:** polyphenols chromatogram obtained by HPLC (protocatechuic acid and coumarin were identified based on their UV spectra (280 nm)). The other peaks were not characterized.

- Data obtained by **Imed Cheraief**  
HP 5890 Series II Gas Chromatograph,  
(Hewlett Packard, San José, CA, USA)

**A**

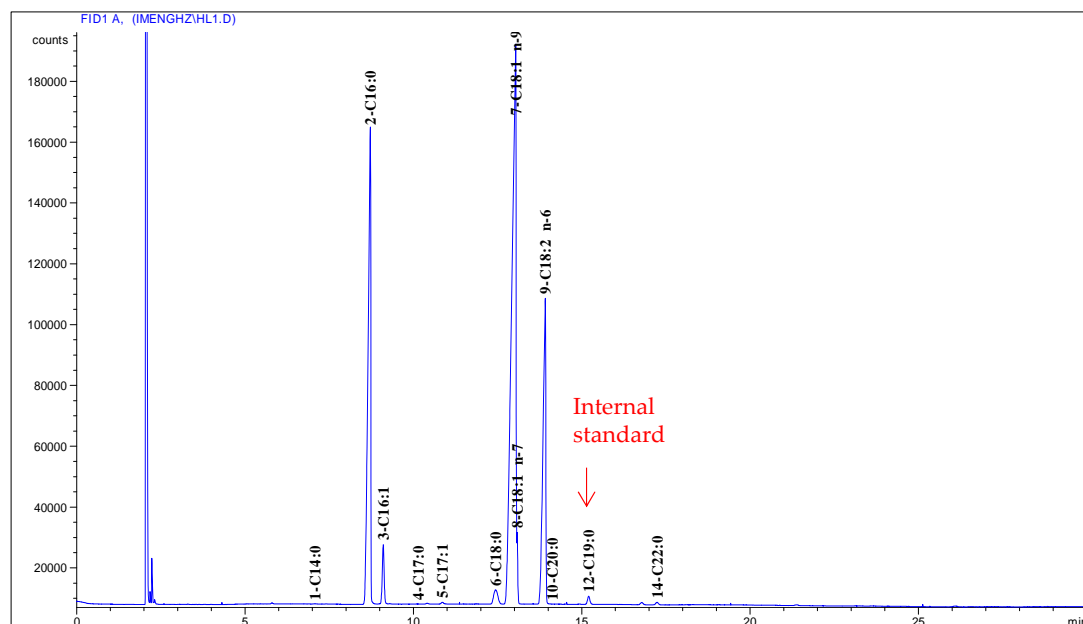

- Data obtained by **Lucy Martine and Niyazi Acar**  
Thermo Fisher Scientific Trace 1310 Gas Chromatograph  
(Thermo Fisher Scientific, Waltham, MA, USA)

**B**

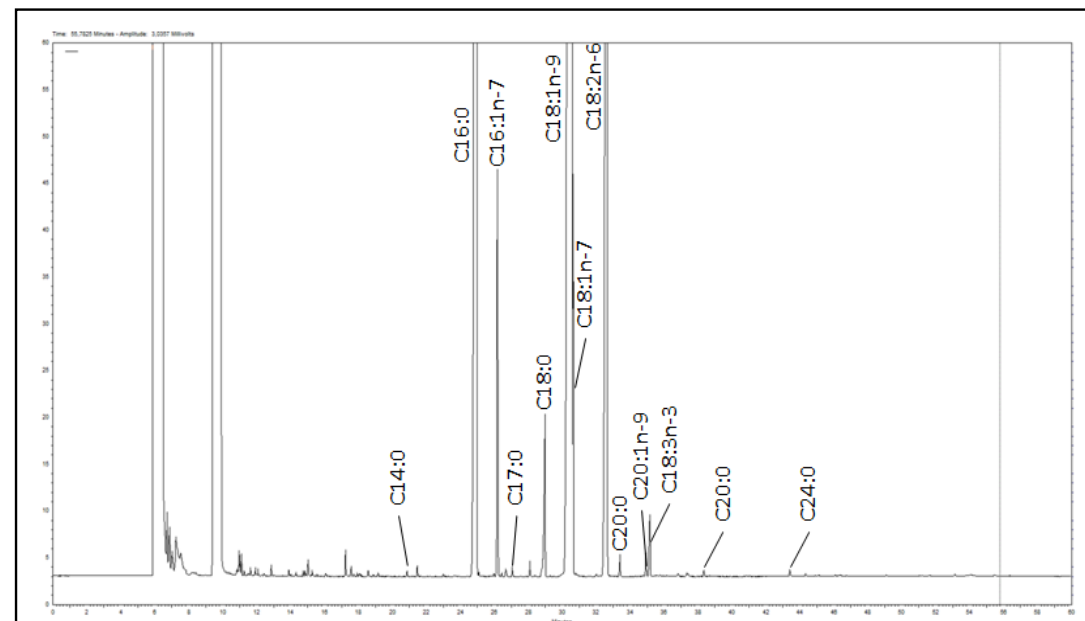

**Supplementary Figure S3:** Fatty acid chromatograms obtained by GC. (A) Chromatogram obtained at the University of Monastir (Monastir, Tunisia) with (C19:0) used as internal standard;

(B) chromatogram obtained at INRAE (Dijon, France) without internal standard.

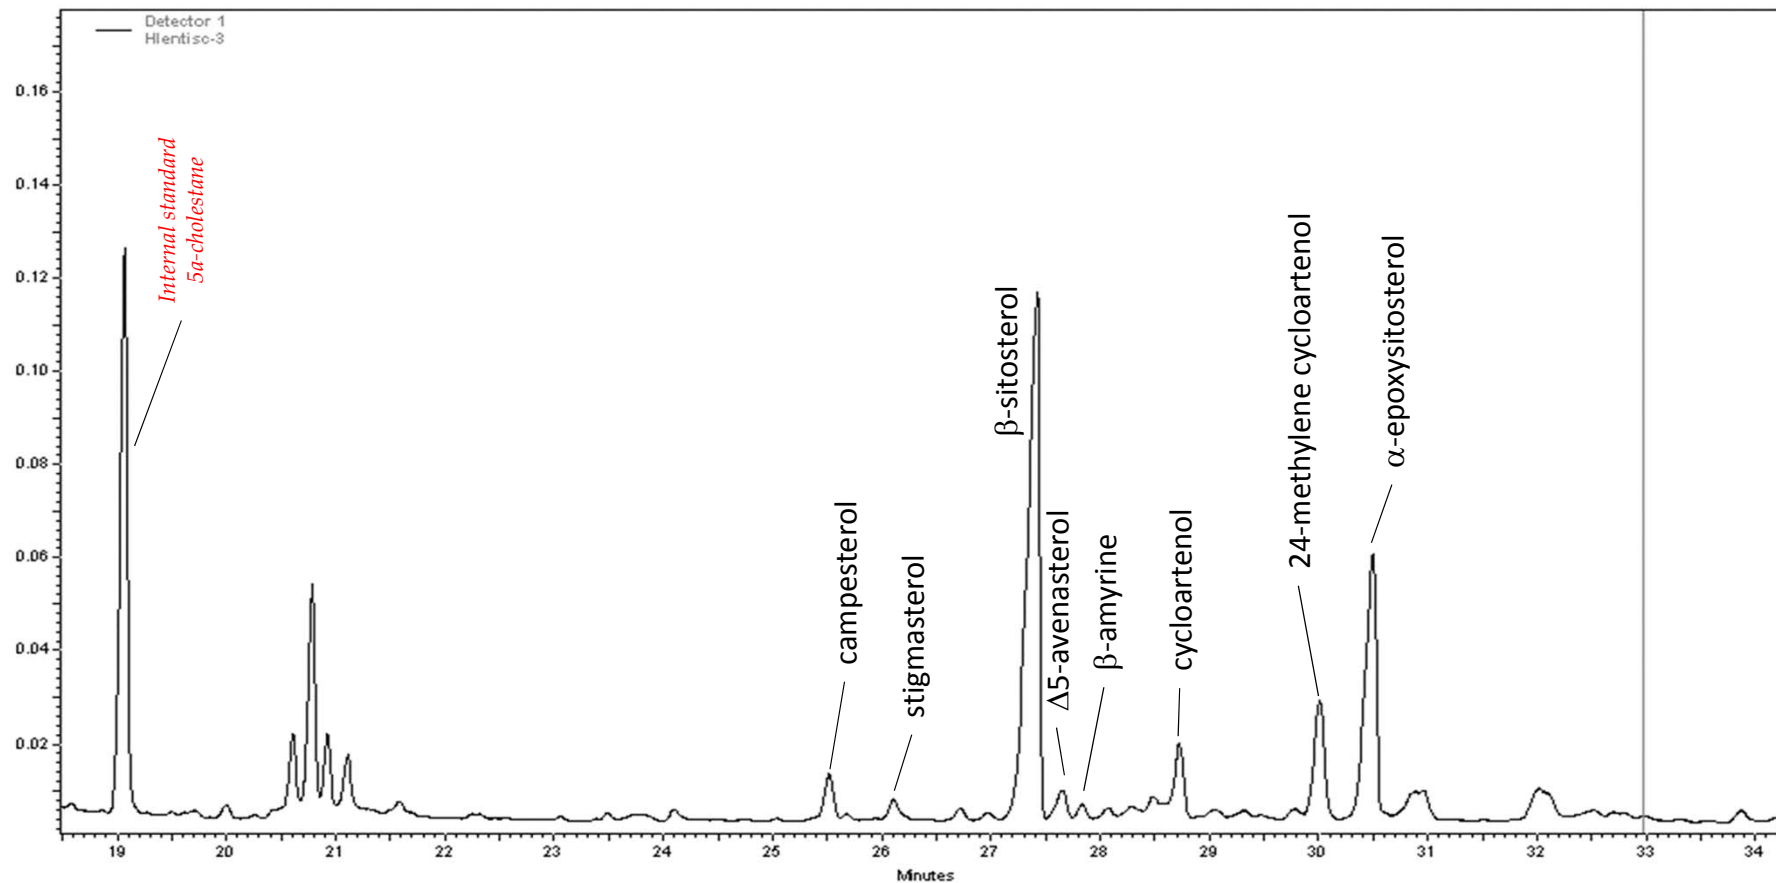

**Supplementary Figure S4:** Phytosterols chromatogram obtained by GC-FID.

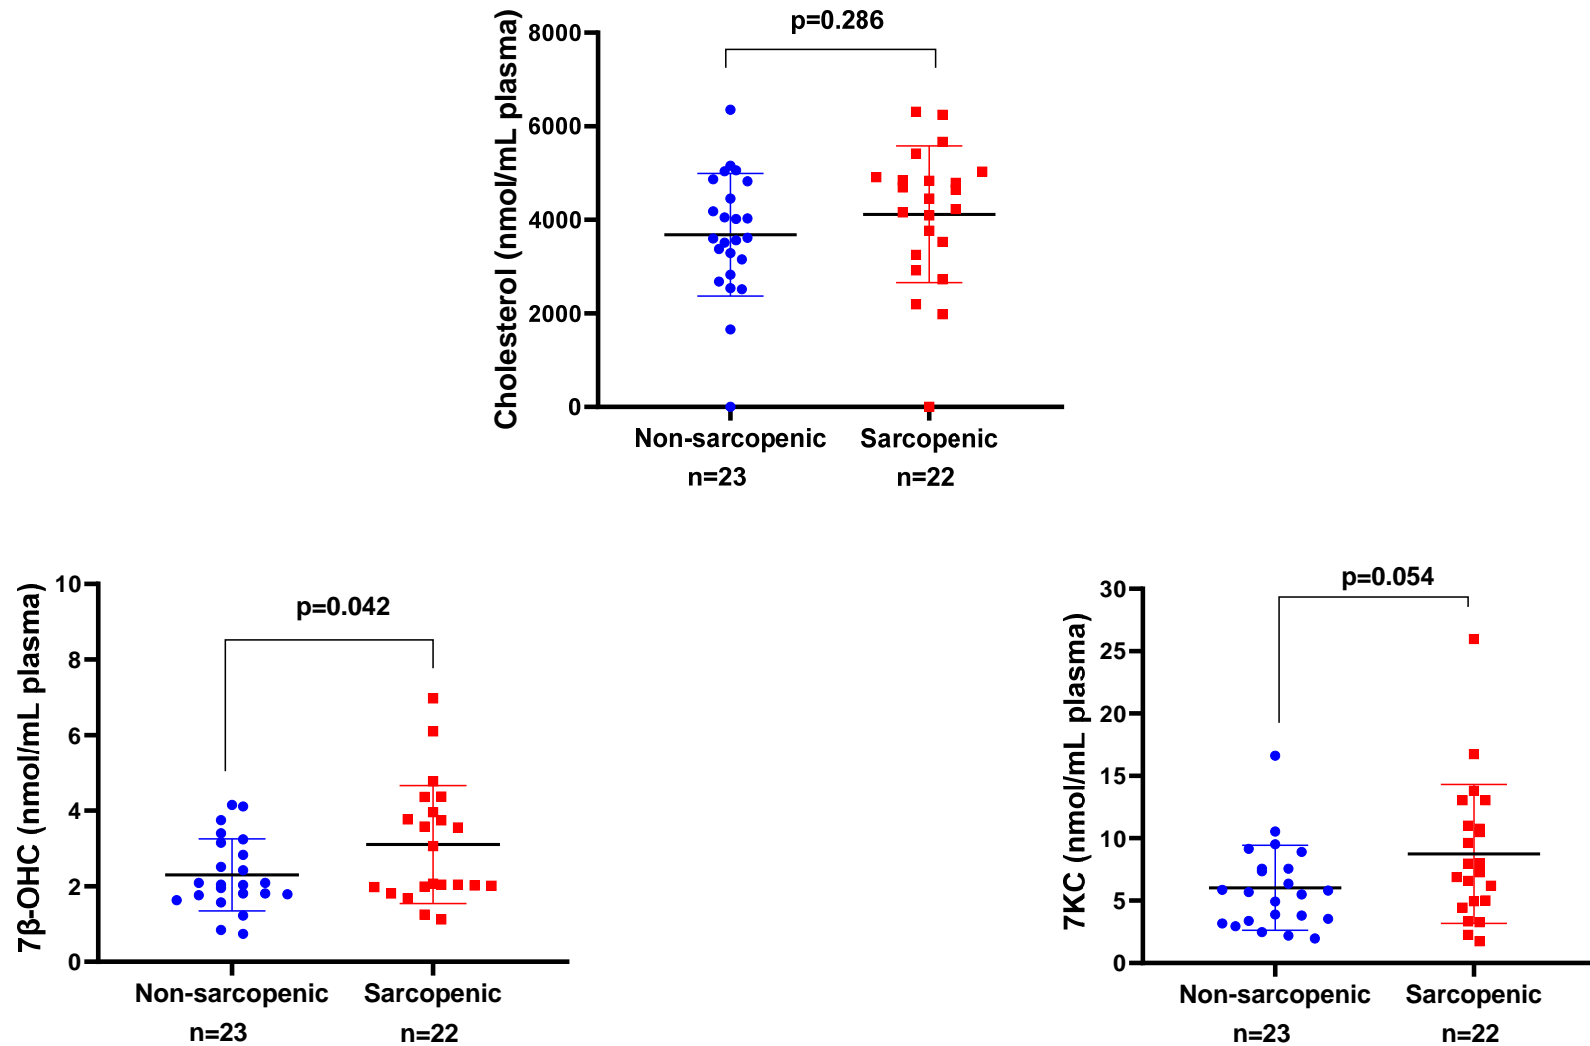

**Supplementary Figure S5: Plasma levels of cholesterol, 7β-hydroxycholesterol and 7-ketocholesterol in sarcopenic patients and non-sarcopenic patients.** 45 adults from 65 years old and more (23 men, 22 women) were recruited over a period of 1 month from January to February 2019. All participants were recruited from a nursing home (Sousse, Tunisia). The Test Timed Up and Go (TUG) was used to classify patients as sarcopenic (22 subjects; age=  $80 \pm 4.16$ ; female/male= 15/7), and non-sarcopenic (23 subjects; age=  $70.84 \pm 4.38$ ; female/male= 7/16). Oxysterols as well as cholesterol were measured by GC-MS in the plasma of non-sarcopenic and sarcopenic subjects. In sarcopenic patients, 7β-OHC level was significantly higher than in non-sarcopenic subjects whereas no significant difference in 7KC and cholesterol level was observed.

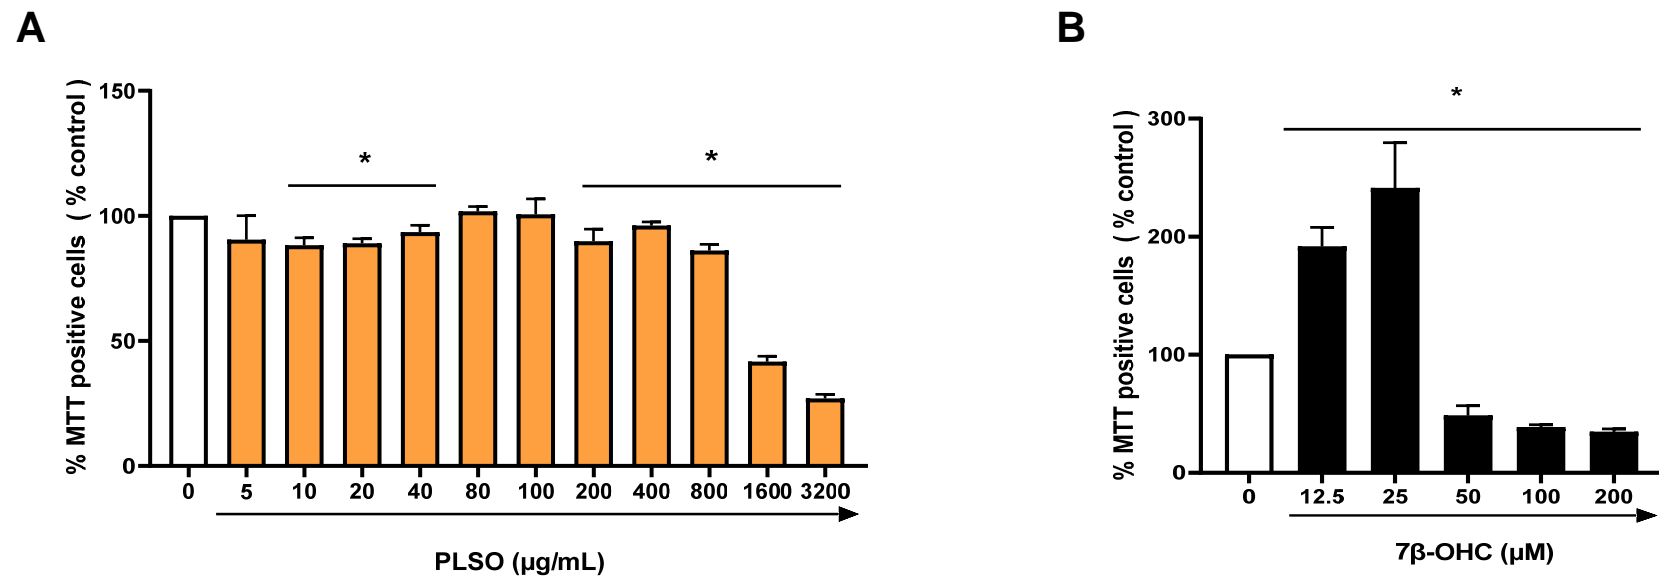

**Supplementary Figure S6: Evaluation with the MTT assay of the effects of *Pistacia lentiscus* L. seed oil (PLSO) and 7β-hydroxycholesterol on C2C12 cell viability.** A: C2C12 cells were incubated with PLSO at different concentrations (5-3,200 µg/mL; 24 h).

B: C2C12 cells were incubated with different concentrations of 7β-OHC (12.5 - 200 µM; 24 h). Cell viability was determined with the MTT assay,

Data are presented as percentage of untreated cells (control).

Data are expressed as mean ± SD of two independent experiments performed in triplicate. The assays were compared to control using a Student's t-test (\*p ≤ 0.05).

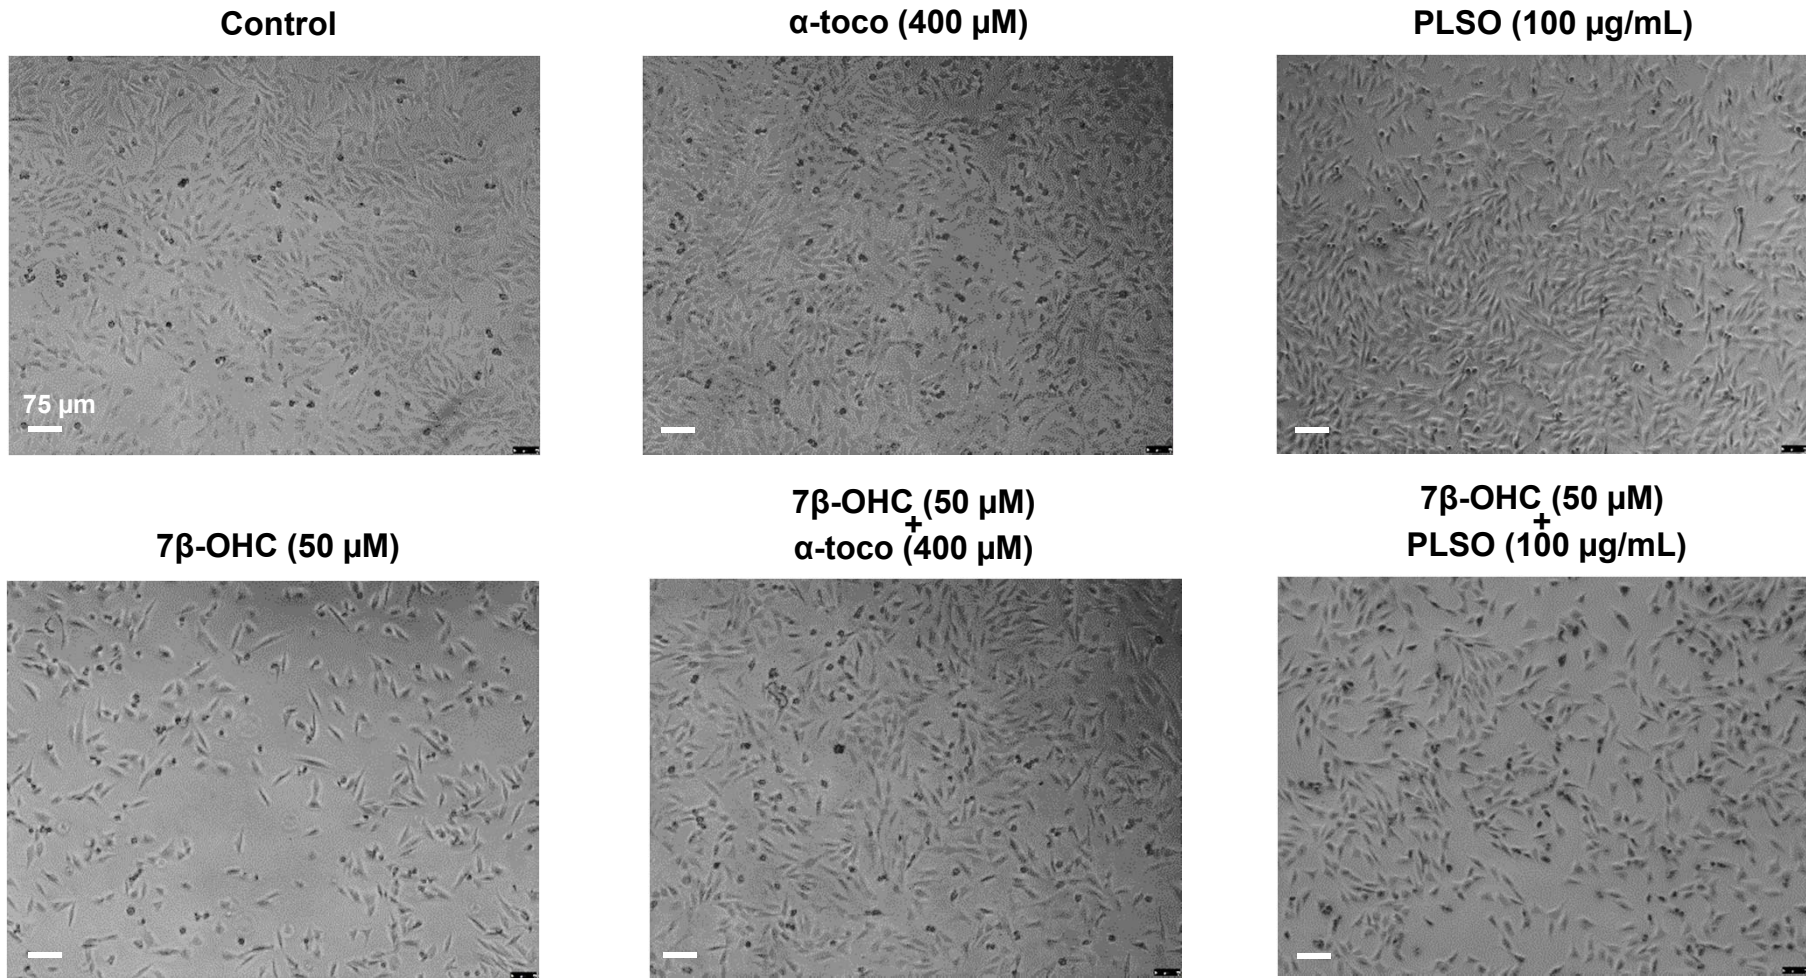

**Supplementary Figure S7 A: Effect of 7 $\beta$ -hydroxycholesterol and *Pistacia lentiscus* L. seed oil (PLSO) on C2C12 cell morphology.** C2C12 cells were incubated for 24 h with or without 7 $\beta$ -OHC (50  $\mu$ M) in the presence or absence of PLSO (100  $\mu$ g/mL) or  $\alpha$ -tocopherol (400  $\mu$ M). The protective effect of PLSO or  $\alpha$ -tocopherol against 7 $\beta$ -OHC- induced modification of cell morphology was realized by phase-contrast microscopy. Further, phase-contrast images of C2C12 in vehicles are shown in **Supplementary Figure 4 B**.



**Control**

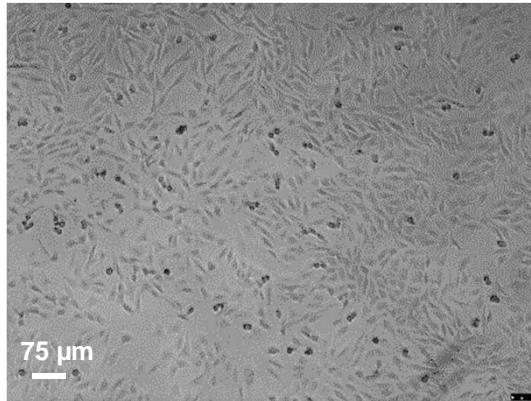

**EtOH 0.5%**

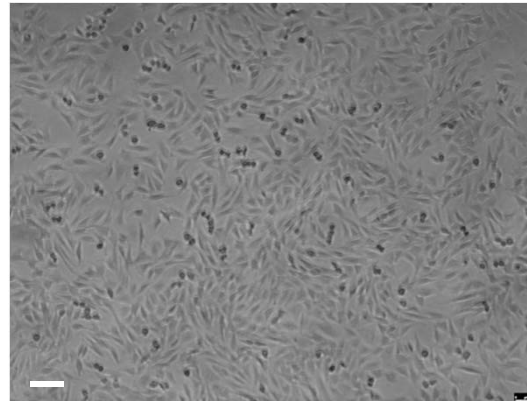

**DMSO 0.125%**

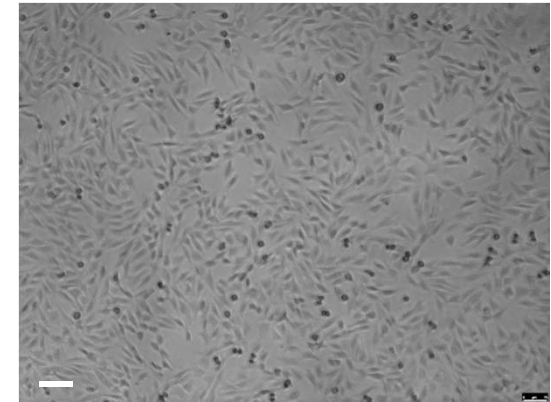

**EtOH 0.1%**

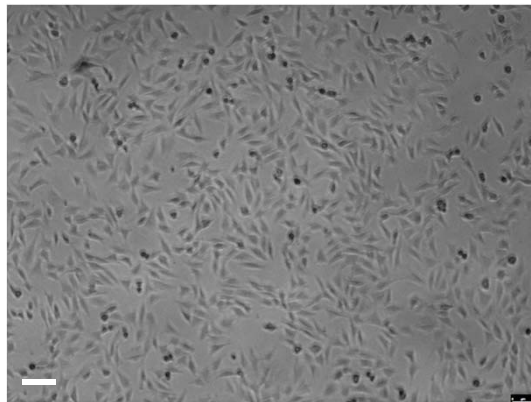

**EtOH 0.1%+DMSO 0.125%**

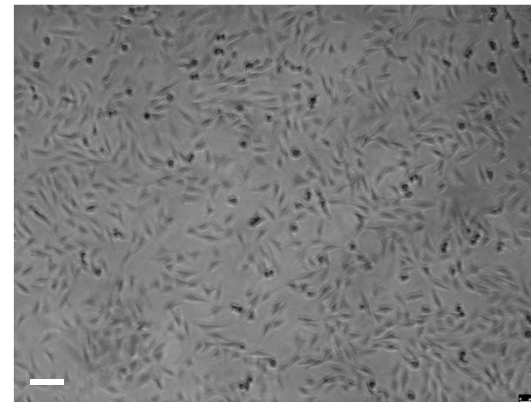

**Supplementary Figure S7 B: Absence of effect of vehicles (EtOH 0.5%; DMSO 1.125%; EtOH 0.1%; EtOH 0.1%+ DMSO 0.125%) on C2C12 cell morphology**



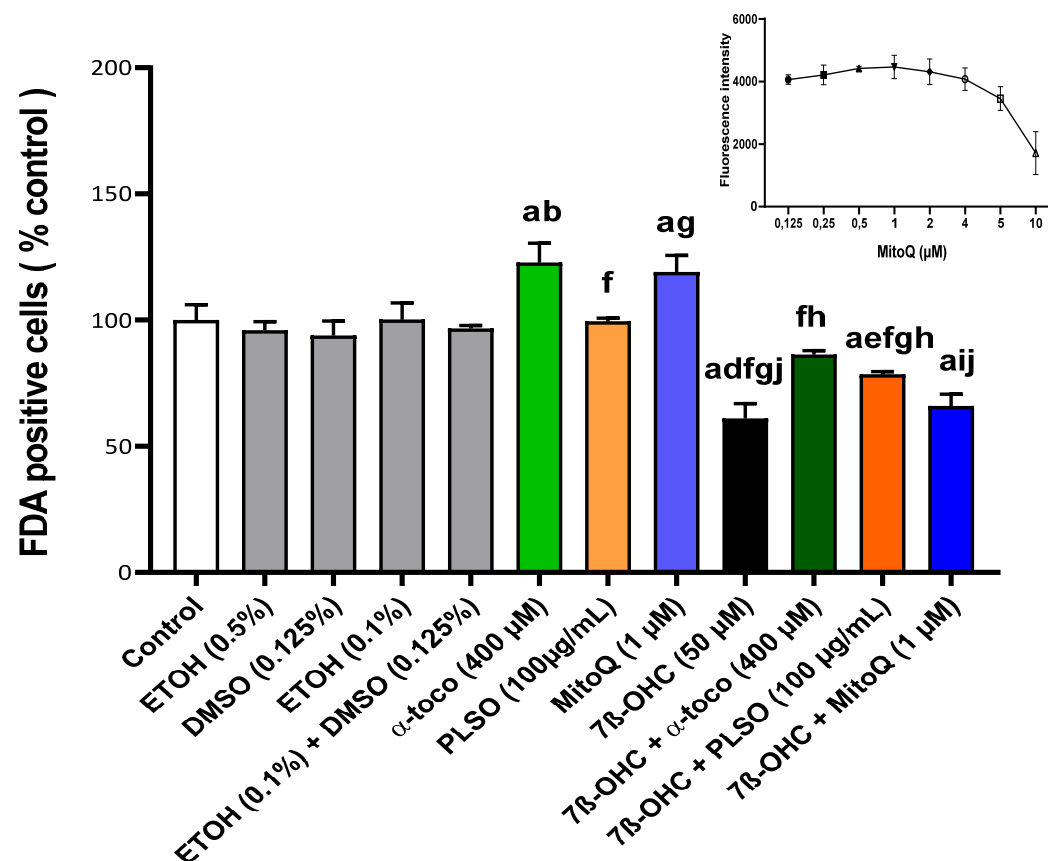

**Supplementary Figure S8: Evaluation with the fluorescein diacetate (FDA) assay of the effect of MitoQ on 7 $\beta$ -hydroxycholesterol-induced cell death.**

C2C12 cells were incubated for 24 h with or without 7 $\beta$ -OHC (50  $\mu$ M) in the presence or absence of PLSO (100  $\mu$ g/mL),  $\alpha$ -tocopherol (400  $\mu$ M), or MitoQ (1  $\mu$ M). Cell viability was then assessed using FDA assay. The concentration of MitoQ (1  $\mu$ M) was chosen on the basis of a dose effect (see insert). This concentration was in agreement with the MitoQ concentration used on others in vitro studies [69,70]. Data are expressed as percentage of control (untreated cells) and are presented as mean  $\pm$  standard deviation (SD) from three independent experiments. A multiple comparative analysis between the groups taking into account the interactions was carried out using an ANOVA test followed by a Tukey test. A P-value less than 0.05 was considered statistically significant. The statistically significant differences between the groups, which are indicated by different letters, take into account the vehicle used. **a** : comparison versus control; **b** : comparison versus ETOH (0.5%); **c** : comparison versus DMSO (0.125%); **d** : comparison versus ETOH (0.1%); **e** : comparison versus (ETOH (0.1%) + DMSO (0.125%)); **f** : comparison versus  $\alpha$ -toco (400  $\mu$ M); **g** : comparison versus PLSO (100  $\mu$ g/mL); **h** : comparison versus 7 $\beta$ -OHC (50  $\mu$ M); **i** : comparison versus 7 $\beta$ -OHC (50  $\mu$ M) +  $\alpha$ -toco (400  $\mu$ M); **j** : comparison versus MitoQ (1  $\mu$ M). No significant differences were observed between untreated (control) and vehicles - treated cells, as well as between 7 $\beta$ -OHC (50  $\mu$ M) and 7 $\beta$ -OHC+ MitoQ treated cells.

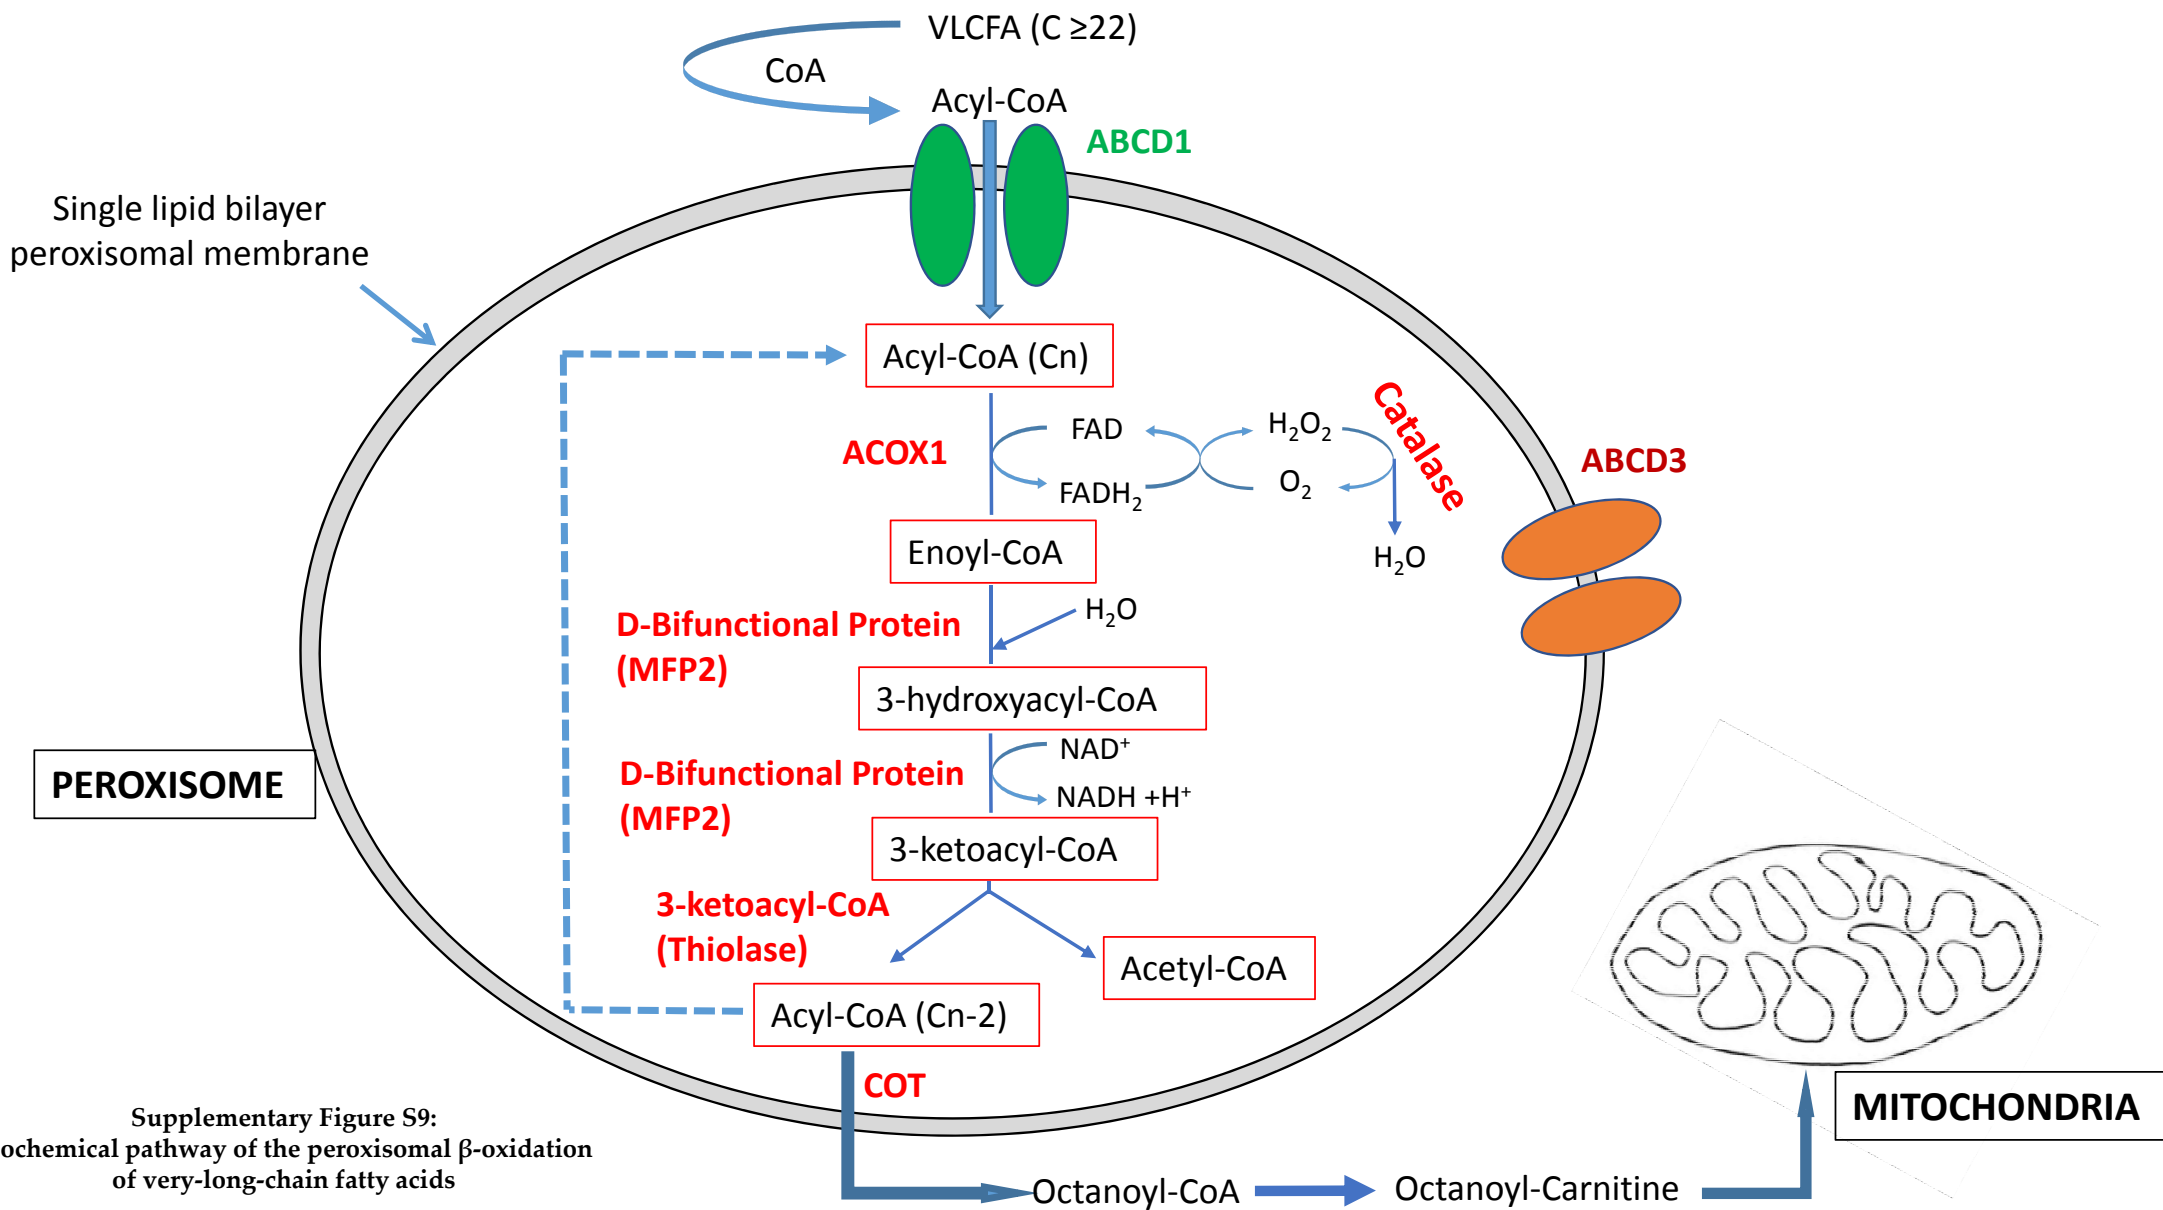

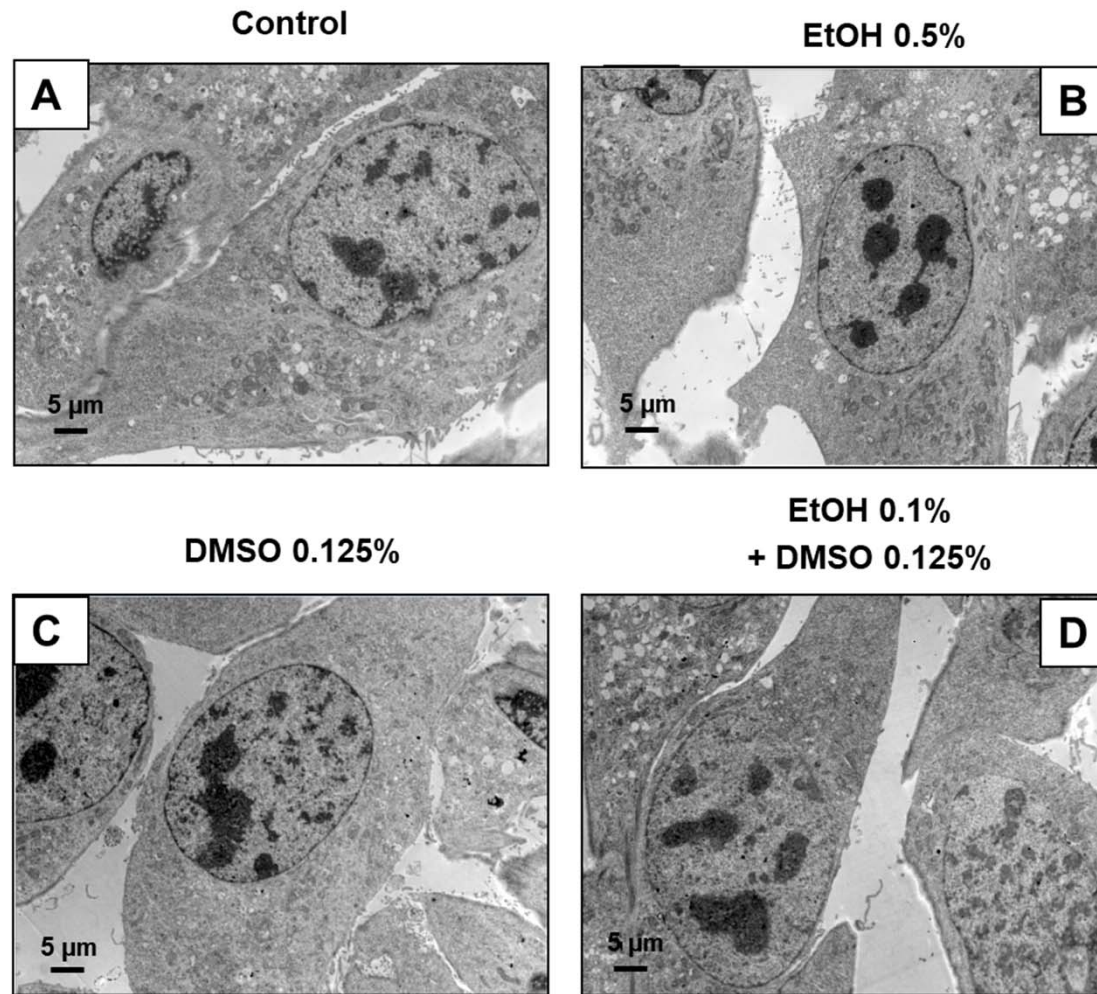

**Supplementary Figure S10: Comparison by transmission electron microscopy of cell morphology in control C2C12 myoblasts and vehicles-treated C2C12 myoblasts.** In untreated cells (control) (A) and vehicles (EtOH 0.5% (B), DMSO 0.125% (C), EtOH 0.1% + DMSO 0.125% (D)), C2C12 cells have similar ultrastructural characteristics: they have a fusiform shape, a large central round nucleus with nucleoli, they contain empty cytoplasmic vacuoles and have morphologically normal mitochondria and peroxisomes.

**Supplementary Table S1:** Available polyphenols spectra present in the database of LARA-Spiral company (Couternon, France)

|          |                                  |          |                               |          |                                |            |                                |
|----------|----------------------------------|----------|-------------------------------|----------|--------------------------------|------------|--------------------------------|
| <b>A</b> | Amentoflavone                    |          | Ethylvanillin                 |          | Neochlorogenic acid            |            | Scopoletin                     |
|          | Apigenin                         |          | Eupafolin                     |          | Neohesperidin                  |            | Secoiraricresinol              |
| <b>B</b> | b-resorcylic acid                | <b>F</b> | Ferulic acid                  |          | N-vanillylnonanamide           |            | Silibinin                      |
| <b>C</b> | Caffeic Acid                     | <b>G</b> | Gallic acid                   | <b>H</b> | <b>O</b>                       | Oleuropein | Silychristine                  |
|          | Caftaric acid                    |          |                               |          | Orientin                       |            | Sinapic acid                   |
|          | Capsaicin                        |          | Hesperetin                    |          | p-Coumaric acid                | <b>S</b>   | Sinapinaldehyde                |
|          | Carnosic acid                    |          | Hesperidin                    |          | Peonidine-3-glucoside chloride |            | Syringaldehyde                 |
|          | Carnosol                         |          | Hispidulin                    |          | Phloridzin, dihydrate          |            | Syringetin                     |
|          | Catechin                         |          | Homoorientine                 |          | p-Hydroxybenzoic acid          |            | Syringetin-3-O-galactoside     |
|          | Catechol                         |          | Homovanillic acid             |          | p-Hydroxyphenylacetic acid     |            | Syringetin-3-O-glucoside       |
|          | Chicoric acid                    |          | Hydroxytyrosol                | <b>I</b> | Picateatarnol                  |            | Syringic acid                  |
|          | Chlorogenic acid                 |          |                               |          | Pinoresinol                    | <b>T</b>   | Taxifolin                      |
|          | Coniferaldehyde                  |          | Isorhamnetin                  | <b>K</b> | Procyanidin A2                 |            | t-Cinnamic acid                |
|          | Coumarin                         |          | Isovitexin                    |          | Procyanidin B1                 |            | Teupolioside                   |
|          | c-Resveratrol                    |          | Kaempferol                    |          | Procyanidin B2                 |            | Thymoquinone                   |
|          | Cryptochlorogenic acid           |          | Kaempferol-3-O-glucoside      |          | Procyanidin B3                 |            | t-piceid                       |
|          | Curcumin                         |          | Kaempferol-3-rutinoside       | <b>L</b> | Procyanidin C1                 |            | t-Pterostilbene                |
|          | Cyanidin-3-glucoside chloride    |          | Kojic acid                    |          | Protocatechic acid             |            | Trans-cinnamaldehyde           |
| <b>D</b> | Delphinidin-3-glucoside chloride |          | Lariciresinol                 | <b>M</b> | Protocatechic aldehyde         |            | Trans-cinnamyl alcohol         |
|          | delta-viniferin                  |          | Luteolin                      |          | Quercetin                      | <b>V</b>   | t-resveratrol                  |
|          | Dihydrocapsaicin                 |          | Malvidin-3-glucoside chloride |          | Quercetin-3B-glucoside         |            | Tyrosol                        |
|          | Diosmin                          |          | Mangiferin                    |          | Quercetin-3-galactoside        |            | Vanillic acid                  |
| <b>E</b> | Ellagic acid                     |          | Matairesinol                  |          | Quercetin-3-O-b-D-glucuronide  |            | Vanillin                       |
|          | Epicatechin                      |          | Myricetin                     |          | Quercetin-3-rhamnoside         |            | Verbascoside                   |
|          | Epicatechin gallate              |          | Myricetin-3-O-galactoside     | <b>Q</b> | Quercetin-4'-glucoside         |            | Vitexin-2"-o-rhamnoside        |
|          | Epigallocatechin                 |          | Myricetin-3-O-glucoside       |          | Quercetin-3,4'-diglucoside     |            | 3,4, 5-trimethoxybenzoic acid  |
|          | Epigallocatechin gallate         |          | Naringenin                    |          | Resorcinol                     |            | 3,4-Dimethoxybenzoic acid      |
|          | epsilon-viniferin                |          | Naringenin                    | <b>R</b> | Rosmarinic acid                |            | 3,4-Dimethoxyphenylacetic acid |
|          | Eriocitrin                       |          | Naringenin-7-glucoside        |          | Rutin                          |            | 2,6-dihydroxybenzoic acid      |
|          | Eriodictiol                      |          | Naringin                      |          |                                |            | 6-gingerol                     |
|          |                                  |          | Narirutin                     |          |                                |            |                                |
